# Supplementary material
Source: PubMed Central journal article supplement (PMC5858567)
Supplement: NIHMS945126-supplement-supplement_1.pdf [file NIHMS945126-supplement-supplement_1.pdf]

## Supplementary Tables

**Supplementary Table 1.** Influenza virus sequences downloaded from the GISAID EpiFlu database for the phylogenetic analysis

| GISAID EpiFlu ID | Isolate Name                    | Subtype   | Collection Date | Passage     | Submitting Lab                                                   |
|------------------|---------------------------------|-----------|-----------------|-------------|------------------------------------------------------------------|
| EPI_ISL_173571   | A/Alaska/38/2014                | H1N1pdm09 | 2014-09-03      | C3          | Centers for Disease Control and Prevention                       |
| EPI_ISL_131353   | A/Bangladesh/2021/2012          | H1N1pdm09 | 2012-07-21      | C1/C4       | Centers for Disease Control and Prevention                       |
| EPI_ISL_145499   | A/Bolivia/559/2013              | H1N1pdm09 | 2013-06-08      | C2          | Centers for Disease Control and Prevention                       |
| EPI_ISL_158707   | A/California/06/2014            | H1N1pdm09 | 2014-02-03      | C1          | Centers for Disease Control and Prevention                       |
| EPI_ISL_159428   | A/California/07/2009            | H1N1pdm09 | 2009-04-09      | E3          | Centers for Disease Control and Prevention                       |
| EPI_ISL_188710   | A/Delaware/39/2015              | H1N1pdm09 | 2015-04-13      | C1          | Centers for Disease Control and Prevention                       |
| EPI_ISL_145504   | A/Dominican Republic/7293/2013  | H1N1pdm09 | 2013-05-01      | C2          | Centers for Disease Control and Prevention                       |
| EPI_ISL_178484   | A/Egypt/4372/2014               | H1N1pdm09 | 2014-10-04      | C3/C2       | Centers for Disease Control and Prevention                       |
| EPI_ISL_178482   | A/Egypt/4758/2014               | H1N1pdm09 | 2014-10-20      | C3/C2       | Centers for Disease Control and Prevention                       |
| EPI_ISL_172641   | A/Ethiopia/1149/2014            | H1N1pdm09 | 2014-10-30      | C1          | Centers for Disease Control and Prevention                       |
| EPI_ISL_172648   | A/Ethiopia/63/2014              | H1N1pdm09 | 2014-11-07      | C2          | Centers for Disease Control and Prevention                       |
| EPI_ISL_172640   | A/Ethiopia/66/2014              | H1N1pdm09 | 2014-11-14      | C2          | Centers for Disease Control and Prevention                       |
| EPI_ISL_189819   | A/Florida/62/2014               | H1N1pdm09 | 2014-10-28      | C3          | Centers for Disease Control and Prevention                       |
| EPI_ISL_163672   | A/Hawaii/06/2014                | H1N1pdm09 | 2014-03-01      | C2          | Centers for Disease Control and Prevention                       |
| EPI_ISL_150295   | A/Hong Kong/5008/2013           | H1N1pdm09 | 2013-09-19      | CX/C2       | Centers for Disease Control and Prevention                       |
| EPI_ISL_153089   | A/Massachusetts/15/2013         | H1N1pdm09 | 2013-11-13      | C3          | Centers for Disease Control and Prevention                       |
| EPI_ISL_166268   | A/Minnesota/15/2014             | H1N1pdm09 | 2014-08-09      | C1          | Centers for Disease Control and Prevention                       |
| EPI_ISL_167881   | A/Minnesota/23/2014             | H1N1pdm09 | 2014-09-06      | C1          | Centers for Disease Control and Prevention                       |
| EPI_ISL_159529   | A/Missouri/02/2014              | H1N1pdm09 | 2014-02-07      | C1          | Centers for Disease Control and Prevention                       |
| EPI_ISL_176807   | A/Montana/05/2015               | H1N1pdm09 | 2015-02-17      | C1          | Centers for Disease Control and Prevention                       |
| EPI_ISL_139900   | A/New Jersey/04/2013            | H1N1pdm09 | 2013-03-19      | C1          | Centers for Disease Control and Prevention                       |
| EPI_ISL_138664   | A/New Mexico/02/2013            | H1N1pdm09 | 2013-01-06      | M1/C2       | Centers for Disease Control and Prevention                       |
| EPI_ISL_188725   | A/New Mexico/17/2015            | H1N1pdm09 | 2015-03-11      | M1/C2       | Centers for Disease Control and Prevention                       |
| EPI_ISL_100059   | A/Nonhaburi/78/2011             | H1N1pdm09 | 2011-06-08      | C1/C2       | Centers for Disease Control and Prevention                       |
| EPI_ISL_166344   | A/North Carolina/04/2014        | H1N1pdm09 | 2014-02-16      | C3          | Centers for Disease Control and Prevention                       |
| EPI_ISL_156812   | A/Pennsylvania/07/2013          | H1N1pdm09 | 2013-10-02      | C3          | Centers for Disease Control and Prevention                       |
| EPI_ISL_159530   | A/Pennsylvania/17/2014          | H1N1pdm09 | 2014-02-11      | C1          | Centers for Disease Control and Prevention                       |
| EPI_ISL_145509   | A/Puerto Rico/01/2013           | H1N1pdm09 | 2013-06-14      | C2          | Centers for Disease Control and Prevention                       |
| EPI_ISL_111385   | A/Rhode Island/02/2012          | H1N1pdm09 | 2012-02-29      | C1          | Centers for Disease Control and Prevention                       |
| EPI_ISL_175880   | A/South Africa/3626/2013        | H1N1pdm09 | 2013-06-06      | E1E2/E3     | Centers for Disease Control and Prevention                       |
| EPI_ISL_142868   | A/Tennessee/03/2013             | H1N1pdm09 | 2013-03-26      | C1          | Centers for Disease Control and Prevention                       |
| EPI_ISL_142576   | A/Utah/05/2013                  | H1N1pdm09 | 2013-04-14      | C1          | Centers for Disease Control and Prevention                       |
| EPI_ISL_143246   | A/Utah/06/2013                  | H1N1pdm09 | 2013-05-12      | C1          | Centers for Disease Control and Prevention                       |
| EPI_ISL_145097   | A/Vietnam/3050/2013             | H1N1pdm09 | 2013-02-28      | C3/C1       | Centers for Disease Control and Prevention                       |
| EPI_ISL_158908   | A/Washington/07/2014            | H1N1pdm09 | 2014-02-10      | C2          | Centers for Disease Control and Prevention                       |
| EPI_ISL_128403   | A/Washington/24/2012            | H1N1pdm09 | 2012-06-17      | C3          | Centers for Disease Control and Prevention                       |
| EPI_ISL_145252   | A/Wisconsin/12/2013             | H1N1pdm09 | 2013-08-04      | C1          | Centers for Disease Control and Prevention                       |
| EPI_ISL_148737   | A/Wisconsin/13/2013             | H1N1pdm09 | 2013-09-05      | C1          | Centers for Disease Control and Prevention                       |
| EPI_ISL_167874   | A/Wisconsin/28/2014             | H1N1pdm09 | 2014-10-06      | C1          | Centers for Disease Control and Prevention                       |
| EPI_ISL_219303   | A/South Australia/17/2013       | H1N1pdm09 | 2013-05-23      | E3          | WHO Collaborating Centre for Reference and Research on Influenza |
| EPI_ISL_148587   | A/Guizhou-Qingzhen/SWL1251/2013 | H1N1pdm09 | 2013-06-04      | C1/C1/MDCK1 | National Institute for Medical Research                          |
| EPI_ISL_153261   | A/Sichuan-Qingyang/SWL1599/2013 | H1N1pdm09 | 2013-11-03      | C2          | WHO Chinese National Influenza Center                            |
| EPI_ISL_156441   | A/Sapporo/16/2014               | H1N1pdm09 | 2014-01-20      | MDCK 1      | National Institute of Infectious Diseases                        |
| EPI_ISL_160497   | A/Shizuoka/46/2014              | H1N1pdm09 | 2014-03-04      | MDCK 1      | National Institute of Infectious Diseases                        |
| EPI_ISL_144758   | A/Acores_PT/139/2013            | H1N1pdm09 | 2013-04-01      | SIAT1/MDCK1 | National Institute for Medical Research                          |
| EPI_ISL_134399   | A/Dakar/20/2012                 | H1N1pdm09 | 2012-12-09      | SIAT2       | National Institute for Medical Research                          |
| EPI_ISL_134400   | A/Dakar/22/2012                 | H1N1pdm09 | 2012-11-03      | MDCK/MDCK1  | National Institute for Medical Research                          |
| EPI_ISL_166054   | A/Ghana/DILI-0567/2014          | H1N1pdm09 | 2014-06-16      | C1/MDCK1    | National Institute for Medical Research                          |
| EPI_ISL_174950   | A/Ghana/FS-14-1022/2014         | H1N1pdm09 | 2014-11-24      | MDCK1       | National Institute for Medical Research                          |
| EPI_ISL_174951   | A/Ghana/FS-14-1025/2014         | H1N1pdm09 | 2014-11-27      | MDCK1       | National Institute for Medical Research                          |
| EPI_ISL_174954   | A/Ghana/FS-14-1069/2014         | H1N1pdm09 | 2014-12-19      | MDCK1       | National Institute for Medical Research                          |
| EPI_ISL_144784   | A/Stockholm/15/2013             | H1N1pdm09 | 2013-03-26      | MDCK0/MDCK1 | National Institute for Medical Research                          |
| EPI_ISL_145683   | A/American Samoa/4786/2013      | H3N2      | 2013-02-22      | C3          | Centers for Disease Control and Prevention                       |
| EPI_ISL_134828   | A/Beijing-Xicheng/12423/2012    | H3N2      | 2012-10-04      | C3/C4       | Centers for Disease Control and Prevention                       |
| EPI_ISL_164402   | A/California/02/2014            | H3N2      | 2014-01-16      | C1S2        | Centers for Disease Control and Prevention                       |
| EPI_ISL_176747   | A/California/20/2015            | H3N2      | 2015-01-20      | S1          | Centers for Disease Control and Prevention                       |
| EPI_ISL_160427   | A/Colorado/11/2014              | H3N2      | 2014-04-13      | C1          | Centers for Disease Control and Prevention                       |
| EPI_ISL_153217   | A/Delaware/17/2013              | H3N2      | 2013-12-02      | C2          | Centers for Disease Control and Prevention                       |
| EPI_ISL_188884   | A/Egypt/4870/2014               | H3N2      | 2014-11-12      | C3/S2       | Centers for Disease Control and Prevention                       |

| GISAID Epiflu ID | Isolate_Name               | Subtype | Collection_Date | Passage     | Submitting_Lab                                                   |
|------------------|----------------------------|---------|-----------------|-------------|------------------------------------------------------------------|
| EPI_ISL_167413   | A/Florida/34/2014          | H3N2    | 2014-09-30      | MX          | Centers for Disease Control and Prevention                       |
| EPI_ISL_172592   | A/Ethiopia/1147/2014       | H3N2    | 2014-10-27      | S1          | Centers for Disease Control and Prevention                       |
| EPI_ISL_171380   | A/Ethiopia/1153/2014       | H3N2    | 2014-11-11      | S1          | Centers for Disease Control and Prevention                       |
| EPI_ISL_179009   | A/Florida/26/2015          | H3N2    | 2015-03-17      | MX/S1       | Centers for Disease Control and Prevention                       |
| EPI_ISL_164418   | A/Hawaii/08/2014           | H3N2    | 2014-03-11      | S3          | Centers for Disease Control and Prevention                       |
| EPI_ISL_168126   | A/Hawaii/47/2014           | H3N2    | 2014-07-18      | S3          | Centers for Disease Control and Prevention                       |
| EPI_ISL_167396   | A/Kentucky/10/2014         | H3N2    | 2014-10-04      | MX          | Centers for Disease Control and Prevention                       |
| EPI_ISL_171375   | A/Kenya/124/2014           | H3N2    | 2014-08-27      | X1/S2       | Centers for Disease Control and Prevention                       |
| EPI_ISL_171399   | A/Kenya/127/2014           | H3N2    | 2014-08-27      | X1/S3       | Centers for Disease Control and Prevention                       |
| EPI_ISL_171377   | A/Kenya/128/2014           | H3N2    | 2014-08-26      | X1/S2       | Centers for Disease Control and Prevention                       |
| EPI_ISL_164406   | A/Louisiana/39/2013        | H3N2    | 2013-12-29      | C1S2        | Centers for Disease Control and Prevention                       |
| EPI_ISL_167933   | A/Maine/04/2014            | H3N2    | 2014-10-09      | S1          | Centers for Disease Control and Prevention                       |
| EPI_ISL_145503   | A/Maryland/04/2013         | H3N2    | 2013-03-06      | M1/C2       | Centers for Disease Control and Prevention                       |
| EPI_ISL_174163   | A/Massachusetts/02/2015    | H3N2    | 2015-01-20      | S1          | Centers for Disease Control and Prevention                       |
| EPI_ISL_151025   | A/Massachusetts/11/2013    | H3N2    | 2013-07-10      | C2          | Centers for Disease Control and Prevention                       |
| EPI_ISL_167937   | A/Michigan/10/2014         | H3N2    | 2014-09-10      | M1/S1       | Centers for Disease Control and Prevention                       |
| EPI_ISL_166983   | A/Michigan/13/2014         | H3N2    | 2014-09-18      | M1          | Centers for Disease Control and Prevention                       |
| EPI_ISL_134881   | A/Minnesota/01/2013        | H3N2    | 2013-01-08      | C1          | Centers for Disease Control and Prevention                       |
| EPI_ISL_164399   | A/Nebraska/04/2014         | H3N2    | 2014-03-11      | S4          | Centers for Disease Control and Prevention                       |
| EPI_ISL_175191   | A/Nevada/10/2015           | H3N2    | 2015-02-14      | S1          | Centers for Disease Control and Prevention                       |
| EPI_ISL_178992   | A/New Hampshire/16/2015    | H3N2    | 2015-03-03      | R1/S1       | Centers for Disease Control and Prevention                       |
| EPI_ISL_169307   | A/New Jersey/26/2014       | H3N2    | 2014-11-17      | Original    | Centers for Disease Control and Prevention                       |
| EPI_ISL_160782   | A/New York/07/2014         | H3N2    | 2014-02-10      | C2          | Centers for Disease Control and Prevention                       |
| EPI_ISL_164405   | A/New York/39/2012         | H3N2    | 2012-10-20      | C2S2        | Centers for Disease Control and Prevention                       |
| EPI_ISL_167399   | A/North Carolina/20/2014   | H3N2    | 2014-09-08      | S1          | Centers for Disease Control and Prevention                       |
| EPI_ISL_179007   | A/Ohio/11/2015             | H3N2    | 2015-03-20      | S1          | Centers for Disease Control and Prevention                       |
| EPI_ISL_139166   | A/Oregon/01/2013           | H3N2    | 2013-01-11      | C1          | Centers for Disease Control and Prevention                       |
| EPI_ISL_164404   | A/Palau/6759/2014          | H3N2    | 2014-03-26      | S2          | Centers for Disease Control and Prevention                       |
| EPI_ISL_182625   | A/Pennsylvania/09/2015     | H3N2    | 2015-01-07      | S2          | Centers for Disease Control and Prevention                       |
| EPI_ISL_189817   | A/South Australia/55/2014  | H3N2    | 2014-06-29      | C1/S3       | Centers for Disease Control and Prevention                       |
| EPI_ISL_165829   | A/Switzerland/9715293/2013 | H3N2    | 2013-12-06      | E4/E2       | Centers for Disease Control and Prevention                       |
| EPI_ISL_172814   | A/Tanzania/1906/2014       | H3N2    | 2014-12-09      | S1          | Centers for Disease Control and Prevention                       |
| EPI_ISL_174125   | A/Tanzania/3565/2014       | H3N2    | 2014-11-20      | S2          | Centers for Disease Control and Prevention                       |
| EPI_ISL_172737   | A/Tanzania/3580/2014       | H3N2    | 2014-11-26      | S1          | Centers for Disease Control and Prevention                       |
| EPI_ISL_172773   | A/Tanzania/594/2014        | H3N2    | 2014-12-05      | S2          | Centers for Disease Control and Prevention                       |
| EPI_ISL_127832   | A/Texas/50/2012            | H3N2    | 2012-04-15      | E4          | Centers for Disease Control and Prevention                       |
| EPI_ISL_145498   | A/Utah/07/2013             | H3N2    | 2013-07-05      | C2          | Centers for Disease Control and Prevention                       |
| EPI_ISL_166309   | A/Washington/18/2013       | H3N2    | 2013-11-29      | S2          | Centers for Disease Control and Prevention                       |
| EPI_ISL_176732   | A/Wisconsin/20/2015        | H3N2    | 2015-02-24      | S1          | Centers for Disease Control and Prevention                       |
| EPI_ISL_167397   | A/Wisconsin/26/2014        | H3N2    | 2014-09-25      | S1          | Centers for Disease Control and Prevention                       |
| EPI_ISL_161267   | A/Brisbane/1/2013          | H3N2    | 2013-01-03      | MDCK3       | WHO Collaborating Centre for Reference and Research on Influenza |
| EPI_ISL_168899   | A/Canberra/82/2014         | H3N2    | 2014-07-31      | MDCK2       | WHO Collaborating Centre for Reference and Research on Influenza |
| EPI_ISL_168901   | A/New Caledonia/71/2014    | H3N2    | 2014-08-13      | MDCK1       | WHO Collaborating Centre for Reference and Research on Influenza |
| EPI_ISL_161272   | A/Victoria/504/2013        | H3N2    | 2013-06-17      | MDCK1       | WHO Collaborating Centre for Reference and Research on Influenza |
| EPI_ISL_149682   | A/Hunan-Lusong/1532/2013   | H3N2    | 2013-06-10      | C1C1/C2     | Centers for Disease Control and Prevention                       |
| EPI_ISL_179373   | A/Zambia/04-288/2014       | H3N2    | 2014-12-11      | MDCK2/SIAT2 | Crick Worldwide Influenza Centre                                 |
| EPI_ISL_172339   | A/Algiers/249/2014         | H3N2    | 2014-12-30      | SIAT2       | National Institute for Medical Research                          |
| EPI_ISL_174979   | A/Algiers/08/2014          | H3N2    | 2014-10-12      | C0/SIAT1    | National Institute for Medical Research                          |
| EPI_ISL_141668   | A/Bulgaria/270/2013        | H3N2    | 2013-02-04      | C1/SIAT1    | National Institute for Medical Research                          |
| EPI_ISL_171746   | A/Dakar/30/2014            | H3N2    | 2014-10-07      | C2/SIAT1    | National Institute for Medical Research                          |
| EPI_ISL_175025   | A/Ghana/DILI-14-1014/2014  | H3N2    | 2014-11-04      | ?/SIAT1     | National Institute for Medical Research                          |
| EPI_ISL_175026   | A/Ghana/DILI-14-1152/2014  | H3N2    | 2014-12-10      | SIAT1       | National Institute for Medical Research                          |
| EPI_ISL_165554   | A/Hong Kong/4801/2014      | H3N2    | 2014-02-26      | SIAT1       | National Institute for Medical Research                          |
| EPI_ISL_168972   | A/Hong Kong/7127/2014      | H3N2    | 2014-07-29      | MDCK1/SIAT2 | National Institute for Medical Research                          |
| EPI_ISL_171756   | A/Madagascar/3069/2014     | H3N2    | 2014-10-22      | MDCK2/SIAT1 | National Institute for Medical Research                          |
| EPI_ISL_175044   | A/Mauritius/853/2014       | H3N2    | 2014-10-22      | MDCK2/SIAT1 | National Institute for Medical Research                          |
| EPI_ISL_175045   | A/Mauritius/912/2014       | H3N2    | 2014-11-10      | MDCK2/SIAT1 | National Institute for Medical Research                          |
| EPI_ISL_162129   | A/Norway/466/2014          | H3N2    | 2014-02-03      | SIAT2       | National Institute for Medical Research                          |
| EPI_ISL_171762   | A/Zambia/04-303/2014       | H3N2    | 2014-11-14      | MDCK2/SIAT1 | National Institute for Medical Research                          |
| EPI_ISL_175067   | A/Zambia/06-024/2014       | H3N2    | 2014-09-15      | MDCK2/SIAT2 | National Institute for Medical Research                          |

**Supplementary Table 2.** GISAID EpiFlu database accession numbers of DR Congo influenza virus isolates genetically characterized at the CDC Atlanta

| GISAID EpiFlu ID | Isolate Name      | Subtype   | HA Genetic Group | Collection Date | Passage | CDCID      | Characterization                                                                    |
|------------------|-------------------|-----------|------------------|-----------------|---------|------------|-------------------------------------------------------------------------------------|
| EPI_ISL_175254   | A/Congo/2275/2014 | H1N1pdm09 | 6B               | 2014-11-06      | C2      | 3000095216 | A/CALIFORNIA/07/2009-LIKE A(H1N1)pdm09                                              |
| EPI_ISL_175259   | A/Congo/2278/2014 | H1N1pdm09 | 6B               | 2014-11-05      | C1      | 3000095217 | A/CALIFORNIA/07/2009-LIKE A(H1N1)pdm09                                              |
| EPI_ISL_176547   | A/Congo/2611/2014 | H3N2      | 3C.3             | 2014-12-29      | S2      | 3000095242 | A/TEXAS/50/2012-LIKE A(H3N2)<br>A/SWITZERLAND/9715293/2013-LIKE<br>A(H3N2)          |
| EPI_ISL_176548   | A/Congo/2557/2014 | H3N2      | 3C.3             | 2014-12-18      | S2      | 3000095233 | A/TEXAS/50/2012-LIKE A(H3N2) LOW<br>A/SWITZERLAND/9715293/2013-LIKE<br>A(H3N2)      |
| EPI_ISL_175217   | A/Congo/2461/2014 | H3N2      | 3C.2a            | 2014-12-08      | S1      | 3000095220 | A/TEXAS/50/2012-LIKE A(H3N2) LOW<br>A/SWITZERLAND/9715293/2013-LIKE<br>A(H3N2)      |
| EPI_ISL_176513   | A/Congo/2538/2014 | H3N2      | 3C.2a            | 2014-12-18      | S2      | 3000095231 | A/TEXAS/50/2012-LIKE A(H3N2) LOW<br>A/SWITZERLAND/9715293/2013-LIKE<br>A(H3N2)      |
| EPI_ISL_175210   | A/Congo/2471/2014 | H3N2      | 3C.2a            | 2014-12-09      | S2      | 3000095222 | INSUFFICIENT TITER FOR TESTING<br>INFLUENZA A(H3N2) BY<br>SEQUENCING/PYROSEQUENCING |
| EPI_ISL_175211   | A/Congo/2458/2014 | H3N2      | 3C.2a            | 2014-12-04      | S2      | 3000095219 | INSUFFICIENT TITER FOR TESTING<br>INFLUENZA A(H3N2) BY<br>SEQUENCING/PYROSEQUENCING |
| EPI_ISL_176515   | A/Congo/2544/2014 | H3N2      | 3C.2a            | 2014-12-17      | S3      | 3000095232 | INSUFFICIENT TITER FOR TESTING<br>INFLUENZA A(H3N2) BY<br>SEQUENCING/PYROSEQUENCING |
| EPI_ISL_189842   | A/Congo/2495/2014 | H3N2      | 3C.2a            | 2014-12-11      | S3      | 3000095227 | VIRUS NOT RECOVERED<br>INFLUENZA A(H3N2)BY<br>SEQUENCING/PYROSEQUENCING             |
